# Supplementary material for: Proteomic analyses of Urine Exosomes reveal New Biomarkers of Diabetes in Pregnancy
Source: PubMed Central journal article supplement (PMC6707737; doi:10.18689/mjd-1000103), 2016-02-01
Supplement: NIHMS1028115-supplement-1.pdf [file NIHMS1028115-supplement-1.pdf]

### Supplementary Data

| Sl. # | GI number | p-val   | p-val FDR | Protein Identification                                                  |
|-------|-----------|---------|-----------|-------------------------------------------------------------------------|
| 1     | 4506773   | 0.00003 | 0.03686   | S100 calcium-binding protein A9                                         |
| 2     | 4502085   | 0.00074 | 0.23121   | pancreatic amylase alpha 2A precursor                                   |
| 3     | 20070125  | 0.00091 | 0.23121   | prolyl 4-hydroxylase, beta subunit precursor                            |
| 4     | 21614544  | 0.00106 | 0.23121   | S100 calcium-binding protein A8                                         |
| 5     | 77539758  | 0.00111 | 0.23121   | histone cluster 2, H4b                                                  |
| 6     | 24497480  | 0.00126 | 0.23121   | solute carrier family 22 member 6 isoform d                             |
| 7     | 4504299   | 0.00193 | 0.26478   | histone cluster 3, H3                                                   |
| 8     | 5803023   | 0.00222 | 0.26478   | lectin, mannose-binding 2                                               |
| 9     | 55956899  | 0.00244 | 0.26478   | keratin 9                                                               |
| 10    | 13162290  | 0.00262 | 0.26478   | betaine-homocysteine methyltransferase 2                                |
| 11    | 21361176  | 0.00282 | 0.26478   | aldehyde dehydrogenase 1A1                                              |
| 12    | 119964718 | 0.00316 | 0.26478   | desmoglein 3 preproprotein                                              |
| 13    | 38016911  | 0.00321 | 0.26478   | stomatin isoform a                                                      |
| 14    | 21361392  | 0.00338 | 0.26478   | pregnancy specific beta-1-glycoprotein 1                                |
| 15    | 4506153   | 0.0036  | 0.26478   | prostasin preproprotein                                                 |
| 16    | 4507033   | 0.00423 | 0.28534   | solute carrier family 5 (sodium/glucose cotransporter), member 2        |
| 17    | 5031839   | 0.0044  | 0.28534   | keratin 6A                                                              |
| 18    | 4809279   | 0.00518 | 0.28923   | annexin VII isoform 2                                                   |
| 19    | 4826762   | 0.00521 | 0.28923   | Haptoglobin                                                             |
| 20    | 66912162  | 0.00542 | 0.28923   | histone cluster 2, H2bf                                                 |
| 21    | 31652249  | 0.00551 | 0.28923   | lipopolysaccharide-binding protein precursor                            |
| 22    | 9257217   | 0.0065  | 0.32589   | folate receptor 1 precursor                                             |
| 23    | 119395754 | 0.00718 | 0.34409   | keratin 5                                                               |
| 24    | 44680145  | 0.00795 | 0.36555   | solute carrier family 23 (nucleobase transporters), member 1 isoform a  |
| 25    | 4557317   | 0.00871 | 0.38447   | annexin A11                                                             |
| 26    | 37694062  | 0.0105  | 0.42637   | aquaporin 1                                                             |
| 27    | 4503029   | 0.01078 | 0.42637   | cellular retinoic acid binding protein 2                                |
| 28    | 4557581   | 0.01082 | 0.42637   | fatty acid binding protein 5 (psoriasis-associated)                     |
| 29    | 4502211   | 0.01197 | 0.45516   | ADP-ribosylation factor 6                                               |
| 30    | 12408656  | 0.01304 | 0.45735   | calpain 1, large subunit                                                |
| 31    | 157805480 | 0.01339 | 0.45735   | pregnancy specific beta-1-glycoprotein 7 precursor                      |
| 32    | 32401453  | 0.01385 | 0.45735   | solute carrier family 36 (proton/amino acid symporter), member 2        |
| 33    | 153945728 | 0.01387 | 0.45735   | microtubule-associated protein 1B                                       |
| 34    | 4757944   | 0.01417 | 0.45735   | CD81 antigen                                                            |
| 35    | 32189392  | 0.01474 | 0.45735   | peroxiredoxin 2 isoform a                                               |
| 36    | 98986445  | 0.01493 | 0.45735   | carcinoembryonic antigen-related cell adhesion molecule 5 preproprotein |
| 37    | 48762934  | 0.01677 | 0.49797   | alpha 2 type I collagen                                                 |
| 38    | 21614513  | 0.01749 | 0.01749   | aldehyde dehydrogenase 1 family, member L1                              |
| 39    | 4557367   | 0.01767 | 0.49797   | bleomycin hydrolase                                                     |
| 40    | 51468073  | 0.01806 | 0.49797   | solute carrier family 6, member 19                                      |
| 41    | 4504517   | 0.02    | 0.51727   | heat shock 27kDa protein 1                                              |

|    |           |         |         |                                                                   |
|----|-----------|---------|---------|-------------------------------------------------------------------|
| 42 | 54873613  | 0.02026 | 0.51727 | Agtrin                                                            |
| 43 | 109255249 | 0.02141 | 0.51727 | keratin 4                                                         |
| 44 | 50592994  | 0.02152 | 0.51727 | Thioredoxin                                                       |
| 45 | 116174789 | 0.02264 | 0.51727 | centrosome spindle pole associated protein 1 isoform a            |
| 46 | 157671931 | 0.02268 | 0.51727 | solute carrier family 5 (sodium/glucose cotransporter), member 12 |
| 47 | 87159824  | 0.0231  | 0.51727 | CD151 antigen                                                     |
| 48 | 116008152 | 0.02352 | 0.51727 | alpha 1 type XV collagen precursor                                |
| 49 | 134254459 | 0.02413 | 0.51727 | sodium potassium chloride cotransporter 2                         |
| 50 | 126012573 | 0.02441 | 0.51727 | low density lipoprotein-related protein 2                         |
| 51 | 116256354 | 0.02458 | 0.51727 | alpha 2 type IV collagen preproprotein                            |
| 52 | 4504349   | 0.02481 | 0.51727 | beta globin                                                       |
| 53 | 4504763   | 0.02486 | 0.51727 | integrin alpha-V precursor                                        |
| 54 | 59850812  | 0.02623 | 0.53575 | uromodulin precursor                                              |
| 55 | 7656922   | 0.02705 | 0.54245 | chromatin modifying protein 2A                                    |
| 56 | 4758236   | 0.02946 | 0.5802  | extracellular matrix protein 1 isoform 1 precursor                |
| 57 | 7019485   | 0.03005 | 0.03005 | programmed cell death 6                                           |
| 58 | 18765694  | 0.03076 | 0.58264 | dipeptidylpeptidase IV                                            |
| 59 | 134244281 | 0.03117 | 0.58264 | melanoma-associated antigen p97 isoform 1, precursor              |
| 60 | 14150145  | 0.03211 | 0.59037 | matrix-remodelling associated 8                                   |
| 61 | 28603818  | 0.03476 | 0.62852 | hypothetical protein LOC338094                                    |
| 62 | 29788785  | 0.03733 | 0.65087 | tubulin, beta                                                     |
| 63 | 119964726 | 0.03744 | 0.65087 | insulin-like growth factor 2 receptor precursor                   |
| 64 | 21361254  | 0.03777 | 0.65087 | deoxyribonuclease I precursor                                     |
| 65 | 4502101   | 0.03859 | 0.65487 | annexin I                                                         |
| 66 | 4503899   | 0.04423 | 0.73915 | N-acetylgalactosamine-6-sulfatase precursor                       |
| 67 | 39995109  | 0.04539 | 0.74722 | GM2 ganglioside activator precursor                               |
| 68 | 87239981  | 0.0475  | 0.76713 | tankyrase, TRF1-interacting ankyrin-related ADP-ribose polymerase |
| 69 | 4826898   | 0.76713 | 0.76713 | profilin 1                                                        |
| 70 | 42741659  | 0.04951 | 0.77688 | ATP-binding cassette sub-family B member 1                        |

**Table S1:** Significantly dysregulated proteins in the GDM group by negative binomial distribution analysis

| Sl. # | GI number | p-val   | p-val FDR | Protein Identification                                      |
|-------|-----------|---------|-----------|-------------------------------------------------------------|
| 1     | 4502027   | 0.00006 | 0.02631   | albumin precursor                                           |
| 2     | 38016911  | 0.00008 | 0.02631   | stomatin isoform a                                          |
| 3     | 4506773   | 0.00009 | 0.02631   | S100 calcium-binding protein A9                             |
| 4     | 31652249  | 0.0001  | 0.02631   | lipopolysaccharide-binding protein precursor                |
| 5     | 122937470 | 0.00021 | 0.04555   | carboxypeptidase N, polypeptide 2, 83kD                     |
| 6     | 115298678 | 0.00025 | 0.04555   | complement component 3 precursor                            |
| 7     | 4504811   | 0.00061 | 0.09676   | junction plakoglobin                                        |
| 8     | 4506153   | 0.00104 | 0.1336    | prostasin preproprotein                                     |
| 9     | 21264363  | 0.00109 | 0.1336    | mannan-binding lectin serine protease 2 isoform 1 precursor |
| 10    | 86793109  | 0.00156 | 0.16728   | complement receptor 1 isoform S precursor                   |

|    |           |         |         |                                                                                                      |
|----|-----------|---------|---------|------------------------------------------------------------------------------------------------------|
| 11 | 6912586   | 0.00169 | 0.16728 | 6-phosphogluconolactonase                                                                            |
| 12 | 58530840  | 0.00182 | 0.16728 | desmoplakin isoform I                                                                                |
| 13 | 65506891  | 0.00216 | 0.17759 | solute carrier family 3 (activators of dibasic and neutral amino acid transport), member 2 isoform c |
| 14 | 4503491   | 0.00225 | 0.17759 | epidermal growth factor (beta-urogastrone)                                                           |
| 15 | 126012573 | 0.00294 | 0.20392 | low density lipoprotein-related protein 2                                                            |
| 16 | 4502179   | 0.00319 | 0.20392 | aquaporin 2                                                                                          |
| 17 | 24497480  | 0.00325 | 0.20392 | solute carrier family 22 member 6 isoform d                                                          |
| 18 | 115298674 | 0.00345 | 0.20392 | nidogen 1 precursor                                                                                  |
| 19 | 21361181  | 0.00351 | 0.20392 | Na <sup>+</sup> /K <sup>+</sup> -ATPase alpha 1 subunit isoform a proprotein                         |
| 20 | 126091152 | 0.0037  | 0.20392 | cubilin                                                                                              |
| 21 | 6382064   | 0.0042  | 0.21566 | 0.21566                                                                                              |
| 22 | 154146262 | 0.0044  | 0.21566 | Fc fragment of IgG binding protein                                                                   |
| 23 | 116256354 | 0.00456 | 0.21566 | alpha 2 type IV collagen preproprotein                                                               |
| 24 | 7524354   | 0.00469 | 0.21566 | dimethylarginine dimethylaminohydrolase 2                                                            |
| 25 | 73858570  | 0.00498 | 0.21982 | complement component 1 inhibitor precursor                                                           |
| 26 | 116008152 | 0.00579 | 0.23976 | alpha 1 type XV collagen precursor                                                                   |
| 27 | 4502067   | 0.00604 | 0.23976 | alpha-1-microglobulin/bikunin precursor                                                              |
| 28 | 4503635   | 0.00609 | 0.23976 | coagulation factor II precursor                                                                      |
| 29 | 31542984  | 0.00632 | 0.24053 | inter-alpha (globulin) inhibitor H4                                                                  |
| 30 | 4504965   | 0.00765 | 0.28112 | L-plastin                                                                                            |
| 31 | 18765694  | 0.00829 | 0.29513 | dipeptidylpeptidase IV                                                                               |
| 32 | 37694062  | 0.00944 | 0.31977 | aquaporin 1                                                                                          |
| 33 | 4758950   | 0.00957 | 0.31977 | peptidylprolyl isomerase B precursor                                                                 |
| 34 | 153945728 | 0.01071 | 0.34747 | microtubule-associated protein 1B                                                                    |
| 35 | 88853069  | 0.01115 | 0.35145 | vitronectin precursor                                                                                |
| 36 | 48762934  | 0.01237 | 0.37128 | alpha 2 type I collagen                                                                              |
| 37 | 51468073  | 0.01279 | 0.37128 | solute carrier family 6, member 19                                                                   |
| 38 | 4502511   | 0.01284 | 0.37128 | complement component 9                                                                               |
| 39 | 27894376  | 0.01313 | 0.37128 | cell adhesion molecule with homology to L1CAM precursor                                              |
| 40 | 21264578  | 0.01375 | 0.37905 | tetraspan 1                                                                                          |
| 41 | 126012571 | 0.0148  | 0.3981  | heparan sulfate proteoglycan 2                                                                       |
| 42 | 4506403   | 0.01587 | 0.40814 | G protein-coupled receptor, family C, group 5, member A                                              |
| 43 | 11321561  | 0.01591 | 0.40814 | hemopexin                                                                                            |
| 44 | 7706451   | 0.01685 | 0.42238 | G protein-coupled receptor, family C, group 5, member B precursor                                    |
| 45 | 58761548  | 0.01747 | 0.42812 | tau tubulin kinase 1                                                                                 |
| 46 | 21071030  | 0.01872 | 0.44894 | alpha 1B-glycoprotein precursor                                                                      |
| 47 | 4507033   | 0.02107 | 0.48572 | solute carrier family 5 (sodium/glucose cotransporter), member 2                                     |
| 48 | 91105159  | 0.02114 | 0.48572 | CD14 antigen precursor                                                                               |
| 49 | 4502503   | 0.02162 | 0.48677 | complement component 4 binding protein, alpha chain precursor                                        |
| 50 | 10863877  | 0.02247 | 0.48742 | phospholipid scramblase 1                                                                            |
| 51 | 59850812  | 0.02297 | 0.48742 | uromodulin precursor                                                                                 |
| 52 | 4507377   | 0.02298 | 0.48742 | serine (or cysteine) proteinase inhibitor, clade A, member 7                                         |
| 53 | 134254459 | 0.02377 | 0.49073 | sodium potassium chloride cotransporter 2                                                            |
| 54 | 116256333 | 0.02414 | 0.49073 | membrane metallo-endopeptidase                                                                       |
| 55 | 7706635   | 0.02461 | 0.49073 | cornulin                                                                                             |
| 56 | 134244281 | 0.02491 | 0.49073 | melanoma-associated antigen p97 isoform 1, precursor                                                 |
| 57 | 124256496 | 0.0268  | 0.51852 | heat shock 70kDa protein 1-like                                                                      |
| 58 | 53729346  | 0.02772 | 0.5246  | plakophilin 1 isoform 1b                                                                             |
| 59 | 4503689   | 0.02806 | 0.5246  | fibrinogen, alpha polypeptide isoform alpha-E preproprotein                                          |
| 60 | 4502085   | 0.0292  | 0.53519 | pancreatic amylase alpha 2A precursor                                                                |
| 61 | 21361176  | 0.0296  | 0.53519 | aldehyde dehydrogenase 1A1                                                                           |
| 62 | 4502105   | 0.03044 | 0.54091 | annexin IV                                                                                           |
| 63 | 4557759   | 0.0309  | 0.54091 | myeloperoxidase                                                                                      |
| 64 | 4503549   | 0.03192 | 0.55011 | elastase 2, neutrophil preproprotein                                                                 |
| 65 | 40217833  | 0.03353 | 0.55862 | G protein-coupled receptor family C, group 5, member C isoform b                                     |

|    |           |         |         |                                                                      |
|----|-----------|---------|---------|----------------------------------------------------------------------|
| 66 | 87196339  | 0.03359 | 0.55862 | collagen, type VI, alpha 1 precursor                                 |
| 67 | 49574489  | 0.03434 | 0.55862 | Na <sup>+</sup> /K <sup>+</sup> -ATPase beta 1 subunit isoform b     |
| 68 | 4504763   | 0.03482 | 0.55862 | integrin alpha-V precursor                                           |
| 69 | 112380628 | 0.03495 | 0.55862 | lysosomal-associated membrane protein 1                              |
| 70 | 5031857   | 0.03669 | 0.57818 | lactate dehydrogenase A                                              |
| 71 | 5123454   | 0.03775 | 0.58646 | heat shock 70kDa protein 1A                                          |
| 72 | 45439327  | 0.04147 | 0.04147 | periplakin                                                           |
| 73 | 109255249 | 0.04235 | 0.63491 | keratin 4                                                            |
| 74 | 4503143   | 0.0426  | 0.63491 | cathepsin D preproprotein                                            |
| 75 | 4504061   | 0.04344 | 0.63892 | glucosamine (N-acetyl)-6-sulfatase precursor                         |
| 76 | 5174387   | 0.04407 | 0.63957 | prominin 1                                                           |
| 77 | 9665262   | 0.04894 | 0.7011  | EGF-containing fibulin-like extracellular matrix protein 1 precursor |

Table S2: Significantly dysregulated proteins in the PGD group by negative binomial distribution analysis

| Sl. # | GI #      | VIP scores | Annotations                                                                                          |
|-------|-----------|------------|------------------------------------------------------------------------------------------------------|
| 1     | 4506773   | 7.7075     | S100 calcium-binding protein A9                                                                      |
| 2     | 5803227   | 4.0166     | tyrosine 3/tryptophan 5 -monooxygenase activation protein, theta polypeptide                         |
| 3     | 65506891  | 3.9476     | solute carrier family 3 (activators of dibasic and neutral amino acid transport), member 2 isoform c |
| 4     | 4504299   | 3.8755     | histone cluster 3, H3                                                                                |
| 5     | 116256354 | 3.8346     | alpha 2 type IV collagen preproprotein                                                               |
| 6     | 77539758  | 3.709      | histone cluster 2, H4b                                                                               |
| 7     | 4506153   | 3.4717     | prostasin preproprotein                                                                              |
| 8     | 9257217   | 3.4696     | folate receptor 1 precursor                                                                          |
| 9     | 38016911  | 3.434      | stomatin isoform a                                                                                   |
| 10    | 4505185   | 3.3661     | macrophage migration inhibitory factor (glycosylation-inhibiting factor)                             |
| 11    | 56243522  | 3.3497     | syntenin isoform 1                                                                                   |
| 12    | 4826762   | 3.3065     | haptoglobin                                                                                          |
| 13    | 122937470 | 3.2718     | carboxypeptidase N, polypeptide 2, 83kD                                                              |
| 14    | 7656922   | 3.2405     | chromatin modifying protein 2A                                                                       |
| 15    | 55749523  | 3.2358     | syntenin isoform 3                                                                                   |
| 16    | 77539055  | 3.2276     | ubiquitin and ribosomal protein L40 precursor                                                        |
| 17    | 31652249  | 3.214      | lipopolysaccharide-binding protein precursor                                                         |
| 18    | 4809279   | 3.0934     | annexin VII isoform 2                                                                                |
| 19    | 32189392  | 2.9747     | peroxiredoxin 2 isoform a                                                                            |
| 20    | 21361181  | 2.948      | Na <sup>+</sup> /K <sup>+</sup> -ATPase alpha 1 subunit isoform a proprotein                         |
| 21    | 24234699  | 2.9417     | keratin 19                                                                                           |
| 22    | 4504253   | 2.8854     | H2A histone family, member X                                                                         |
| 23    | 21614544  | 2.8484     | S100 calcium-binding protein A8                                                                      |
| 24    | 4503117   | 2.8454     | cystatin B                                                                                           |
| 25    | 66912162  | 2.7888     | histone cluster 2, H2bf                                                                              |
| 26    | 4826898   | 2.7639     | profilin 1                                                                                           |
| 27    | 116008152 | 2.6908     | alpha 1 type XV collagen precursor                                                                   |
| 28    | 4502211   | 2.6618     | ADP-ribosylation factor 6                                                                            |
| 29    | 7019485   | 2.6024     | programmed cell death 6                                                                              |
| 30    | 9966777   | 2.5502     | resistin                                                                                             |
| 31    | 5031857   | 2.5453     | lactate dehydrogenase A                                                                              |
| 32    | 4557287   | 2.536      | angiotensinogen preproprotein                                                                        |
| 33    | 21361176  | 2.4817     | aldehyde dehydrogenase 1A1                                                                           |
| 34    | 7705885   | 2.4528     | vacuolar protein sorting 28 isoform 1                                                                |
| 35    | 4504349   | 2.4504     | beta globin                                                                                          |
| 36    | 40354205  | 2.4308     | aldolase B                                                                                           |
| 37    | 14150145  | 2.402      | matrix-remodelling associated 8                                                                      |
| 38    | 20070125  | 2.3701     | prolyl 4-hydroxylase, beta subunit precursor                                                         |
| 39    | 155969697 | 2.3701     | keratin 6C                                                                                           |
| 40    | 164663836 | 2.3322     | pregnancy specific beta-1-glycoprotein 11 isoform 1                                                  |
| 41    | 119964718 | 2.2922     | desmoglein 3 preproprotein                                                                           |
| 42    | 11386147  | 2.2884     | prosaposin isoform a preproprotein                                                                   |
| 43    | 4504347   | 2.2462     | alpha 1 globin                                                                                       |
| 44    | 17921989  | 2.1848     | tubulin, alpha 4a                                                                                    |
| 45    | 24308440  | 2.1839     | family with sequence similarity 125, member A                                                        |
| 46    | 4885179   | 2.1769     | defensin, alpha 3 preproprotein                                                                      |

|     |           |        |                                                                                 |
|-----|-----------|--------|---------------------------------------------------------------------------------|
| 47  | 157671931 | 2.1546 | solute carrier family 5 (sodium/glucose cotransporter), member 12               |
| 48  | 37694062  | 2.1335 | aquaporin 1                                                                     |
| 49  | 19913424  | 2.1262 | ATPase, H+ transporting, lysosomal 70kD, V1 subunit A, isoform 1                |
| 50  | 4503029   | 2.1207 | cellular retinoic acid binding protein 2                                        |
| 51  | 6598323   | 2.1154 | GDP dissociation inhibitor 2                                                    |
| 52  | 4885607   | 2.0963 | small proline-rich protein 3                                                    |
| 53  | 67191208  | 2.0877 | ubiquitin C                                                                     |
| 54  | 89357932  | 2.0783 | keratin 5b                                                                      |
| 55  | 50592994  | 2.0491 | thioredoxin                                                                     |
| 56  | 4758984   | 2.0242 | Ras-related protein Rab-11A                                                     |
| 57  | 5803225   | 2.0225 | tyrosine 3/tryptophan 5 -monooxygenase activation protein, epsilon polypeptide  |
| 58  | 13162290  | 2.0047 | betaine-homocysteine methyltransferase 2                                        |
| 59  | 4757944   | 2.0019 | CD81 antigen                                                                    |
| 60  | 6382064   | 1.9736 | prostatic acid phosphatase precursor                                            |
| 61  | 21361392  | 1.957  | pregnancy specific beta-1-glycoprotein 1                                        |
| 62  | 24497480  | 1.9544 | solute carrier family 22 member 6 isoform d                                     |
| 63  | 32189394  | 1.9416 | ATP synthase, H+ transporting, mitochondrial F1 complex, beta subunit precursor |
| 64  | 4502101   | 1.939  | annexin I                                                                       |
| 65  | 88853069  | 1.9077 | vitronectin precursor                                                           |
| 66  | 4503471   | 1.8901 | eukaryotic translation elongation factor 1 alpha 1                              |
| 67  | 24430144  | 1.8457 | glutathione S-transferase A3                                                    |
| 68  | 32401453  | 1.8451 | solute carrier family 36 (proton/amino acid symporter), member 2                |
| 69  | 4557581   | 1.8396 | fatty acid binding protein 5 (psoriasis-associated)                             |
| 70  | 118582275 | 1.8343 | superoxide dismutase 3, extracellular precursor                                 |
| 71  | 119703753 | 1.8246 | 1.8246                                                                          |
| 72  | 18765694  | 1.8066 | dipeptidylpeptidase IV                                                          |
| 73  | 12667788  | 1.7874 | myosin, heavy polypeptide 9, non-muscle                                         |
| 74  | 5031809   | 1.7777 | immunoglobulin superfamily containing leucine-rich repeat                       |
| 75  | 49574489  | 1.7717 | Na+/K+ -ATPase beta 1 subunit isoform b                                         |
| 76  | 8393956   | 1.7516 | serine (or cysteine) proteinase inhibitor, clade B (ovalbumin), member 13       |
| 77  | 4507033   | 1.7399 | solute carrier family 5 (sodium/glucose cotransporter), member 2                |
| 78  | 10280622  | 1.7383 | amylase, pancreatic, alpha-2B precursor                                         |
| 79  | 4507377   | 1.7349 | serine (or cysteine) proteinase inhibitor, clade A, member 7                    |
| 80  | 4506979   | 1.7337 | solute carrier family 13 (sodium-dependent dicarboxylate transporter), member 2 |
| 81  | 47419930  | 1.7058 | chondroitin sulfate proteoglycan 4                                              |
| 82  | 44680145  | 1.6934 | solute carrier family 23 (nucleobase transporters), member 1 isoform a          |
| 83  | 115298674 | 1.6917 | nidogen 1 precursor                                                             |
| 84  | 40068518  | 1.6912 | phosphogluconate dehydrogenase                                                  |
| 85  | 87159824  | 1.691  | CD151 antigen                                                                   |
| 86  | 4885111   | 1.6836 | calmodulin-like 3                                                               |
| 87  | 4758236   | 1.6805 | extracellular matrix protein 1 isoform 1 precursor                              |
| 88  | 4557321   | 1.6767 | apolipoprotein A-I preproprotein                                                |
| 89  | 4504517   | 1.6746 | heat shock 27kDa protein 1                                                      |
| 90  | 6912582   | 1.6657 | penta-EF-hand domain containing 1                                               |
| 91  | 30089930  | 1.6653 | N-acylsphingosine amidohydrolase (acid ceramidase) 1 isoform b                  |
| 92  | 4502067   | 1.6635 | alpha-1-microglobulin/bikunin precursor                                         |
| 93  | 17865802  | 1.6598 | vacuolar protein sorting factor 4B                                              |
| 94  | 7524354   | 1.6502 | dimethylarginine dimethylaminohydrolase 2                                       |
| 95  | 5031635   | 1.6369 | cofilin 1 (non-muscle)                                                          |
| 96  | 5803185   | 1.6322 | synaptophysin-like 1 isoform a                                                  |
| 97  | 20357529  | 1.6111 | guanine nucleotide-binding protein, beta-2 subunit                              |
| 98  | 4507025   | 1.5925 | solute carrier family 4, sodium bicarbonate cotransporter, member 4 isoform 2   |
| 99  | 31542306  | 1.5884 | chromatin modifying protein 1B                                                  |
| 100 | 87196339  | 1.586  | collagen, type VI, alpha 1 precursor                                            |
| 101 | 148536848 | 1.5748 | carboxyl ester lipase precursor                                                 |
| 102 | 23943854  | 1.5601 | pepsinogen 5, group I                                                           |
| 103 | 98986445  | 1.5597 | carcinoembryonic antigen-related cell adhesion molecule 5 preproprotein         |

|     |          |        |                                                         |
|-----|----------|--------|---------------------------------------------------------|
| 104 | 12408656 | 1.5565 | calpain 1, large subunit                                |
| 105 | 63252913 | 1.5509 | gelsolin-like capping protein                           |
| 106 | 29788785 | 1.5331 | ubulin, beta                                            |
| 107 | 4506403  | 1.5005 | G protein-coupled receptor, family C, group 5, member A |

Table S3: Variable Importance in Projection Scores for proteins by spectral count, NL vs GDM

| Sl. # | GI #      | VIP scores | Annotations                                                                 |
|-------|-----------|------------|-----------------------------------------------------------------------------|
| 1     | 4506773   | 4.632      | S100 calcium-binding protein A9                                             |
| 2     | 4557321   | 4.2308     | apolipoprotein A-I preproprotein                                            |
| 3     | 4506153   | 4.0883     | prostasin preproprotein                                                     |
| 4     | 6912586   | 3.6375     | 6-phosphogluconolactonase                                                   |
| 5     | 38016911  | 3.5797     | stomatin isoform a                                                          |
| 6     | 4507377   | 3.5105     | serine (or cysteine) proteinase inhibitor, clade A, member 7                |
| 7     | 164663836 | 3.4421     | pregnancy specific beta-1-glycoprotein 11 isoform 1                         |
| 8     | 7524354   | 3.3078     | dimethylarginine dimethylaminohydrolase 2                                   |
| 9     | 33286418  | 3.302      | pyruvate kinase, muscle isoform 1                                           |
| 10    | 116008152 | 3.2799     | alpha 1 type XV collagen precursor                                          |
| 11    | 70906439  | 3.2533     | fibrinogen, gamma chain isoform gamma-B precursor                           |
| 12    | 5454052   | 3.1659     | stratifin                                                                   |
| 13    | 87196339  | 3.1386     | collagen, type VI, alpha 1 precursor                                        |
| 14    | 40217833  | 3.1087     | G protein-coupled receptor family C, group 5, member C isoform b            |
| 15    | 4502067   | 3.0079     | alpha-1-microglobulin/bikunin precursor                                     |
| 16    | 4757944   | 3.0035     | CD81 antigen                                                                |
| 17    | 5802984   | 2.9308     | UDP-GlcNAc:betaGal beta-1,3-N-acetylglucosaminyltransferase 1               |
| 18    | 4504811   | 2.9082     | junction plakoglobin                                                        |
| 19    | 122937470 | 2.8826     | carboxypeptidase N, polypeptide 2, 83kD                                     |
| 20    | 21361181  | 2.8526     | Na+/K+ -ATPase alpha 1 subunit isoform a proprote                           |
| 21    | 73858570  | 2.8491     | complement component 1 inhibitor precursor                                  |
| 22    | 115298674 | 2.7204     | nidogen 1 precursor                                                         |
| 23    | 10863877  | 2.6684     | phospholipid scramblase 1                                                   |
| 24    | 5123454   | 2.6459     | heat shock 70kDa protein 1A                                                 |
| 25    | 116256354 | 2.6122     | alpha 2 type IV collagen preproprotein                                      |
| 26    | 18765694  | 2.5936     | dipeptidylpeptidase IV                                                      |
| 27    | 4557871   | 2.5471     | transferrin                                                                 |
| 28    | 7706451   | 2.5324     | G protein-coupled receptor, family C, group 5, member B precursor           |
| 29    | 24497480  | 2.4617     | solute carrier family 22 member 6 isoform d                                 |
| 30    | 31377727  | 2.4543     | solute carrier family 44, member 2                                          |
| 31    | 42716297  | 2.4472     | clusterin isoform 1                                                         |
| 32    | 4502179   | 2.4194     | aquaporin 2                                                                 |
| 33    | 115298678 | 2.4178     | complement component 3 precursor                                            |
| 34    | 31652249  | 2.4169     | lipopolysaccharide-binding protein precursor                                |
| 35    | 7706635   | 2.3959     | cornulin                                                                    |
| 36    | 71773110  | 2.3568     | apolipoprotein A-IV precursor                                               |
| 37    | 6382064   | 2.3309     | prostatic acid phosphatase precursor                                        |
| 38    | 58530840  | 2.2471     | desmoplakin isoform I                                                       |
| 39    | 21071030  | 2.2143     | alpha 1B-glycoprotein precursor                                             |
| 40    | 16418467  | 2.2057     | leucine-rich alpha-2-glycoprotein 1                                         |
| 41    | 157671931 | 2.1969     | solute carrier family 5 (sodium/glucose cotransporter), member 12           |
| 42    | 4507953   | 2.1733     | tyrosine 3/tryptophan 5 -monooxygenase activation protein, zeta polypeptide |
| 43    | 4503635   | 2.1671     | coagulation factor II precursor                                             |
| 44    | 4505881   | 2.164      | plasminogen                                                                 |
| 45    | 4826772   | 2.1637     | insulin-like growth factor binding protein, acid labile subunit             |
| 46    | 21361392  | 2.1522     | pregnancy specific beta-1-glycoprotein 1                                    |
| 47    | 4758950   | 2.1491     | peptidylprolyl isomerase B precursor                                        |

|    |            |        |                                                                                                      |
|----|------------|--------|------------------------------------------------------------------------------------------------------|
| 48 | 24430192   | 2.1243 | keratin 16                                                                                           |
| 49 | 50659080   | 2.1066 | serpin peptidase inhibitor, clade A, member 3 precursor                                              |
| 50 | 67782351   | 2.0669 | complement component 4B preproprotein                                                                |
| 51 | 4505591    | 2.0643 | peroxiredoxin 1                                                                                      |
| 52 | 4502205    | 2.0557 | ADP-ribosylation factor 4                                                                            |
| 53 | 9257232    | 2.055  | orosomucoid 1 precursor                                                                              |
| 54 | 13929462   | 2.0409 | UDP-Gal:betaGlcNAc beta 1,4- galactosyltransferase 1, membrane-bound form                            |
| 55 | 5174387    | 2.0403 | prominin 1                                                                                           |
| 56 | prominin 1 | 2.0343 | vacuolar protein sorting 37D                                                                         |
| 57 | 19913424   | 2.0339 | ATPase, H+ transporting, lysosomal 70kD, V1 subunit A, isoform 1                                     |
| 58 | 21264363   | 2.0322 | mannan-binding lectin serine protease 2 isoform 1 precursor                                          |
| 59 | 21361302   | 2.0251 | serine (or cysteine) proteinase inhibitor, clade A (alpha-1 antiproteinase, antitrypsin), member 4   |
| 60 | 42740907   | 2.0186 | clusterin isoform 2                                                                                  |
| 61 | 21361176   | 1.9999 | aldehyde dehydrogenase 1A1                                                                           |
| 62 | 34335272   | 1.9927 | endothelial protein C receptor precursor                                                             |
| 63 | 65506891   | 1.9858 | solute carrier family 3 (activators of dibasic and neutral amino acid transport), member 2 isoform c |
| 64 | 89903012   | 1.9843 | cell division cycle 42 isoform 1                                                                     |
| 65 | 70906435   | 1.9481 | fibrinogen, beta chain preproprotein                                                                 |
| 66 | 23943854   | 1.932  | pepsinogen 5, group I                                                                                |
| 67 | 28395033   | 1.9184 | ras homolog gene family, member C precursor                                                          |
| 68 | 145701025  | 1.9094 | multiple EGF-like-domains 8                                                                          |
| 69 | 5803023    | 1.9071 | lectin, mannose-binding 2                                                                            |
| 70 | 61835217   | 1.8962 | 3-mercaptopyruvate sulfurtransferase                                                                 |
| 71 | 4504965    | 1.8932 | L-plastin                                                                                            |
| 72 | 16418397   | 1.8861 | MAL2 proteolipid protein                                                                             |
| 73 | 4503491    | 1.8649 | epidermal growth factor (beta-urogastrone)                                                           |
| 74 | 4506403    | 1.8364 | G protein-coupled receptor, family C, group 5, member A                                              |
| 75 | 4502403    | 1.8286 | biglycan preproprotein                                                                               |
| 76 | 21389623   | 1.8208 | prominin 2                                                                                           |
| 77 | 51468073   | 1.8142 | solute carrier family 6, member 19                                                                   |
| 78 | 7661678    | 1.8103 | RAP1B, member of RAS oncogene family                                                                 |
| 79 | 5803185    | 1.7818 | synaptophysin-like 1 isoform a                                                                       |
| 80 | 119703753  | 1.7729 | keratin 6B                                                                                           |
| 81 | 24111250   | 1.7602 | guanine nucleotide binding protein (G protein), alpha 13                                             |
| 82 | 4502085    | 1.7546 | pancreatic amylase alpha 2A precursor                                                                |
| 83 | 5902072    | 1.7323 | serine (or cysteine) proteinase inhibitor, clade B (ovalbumin), member 3                             |
| 84 | 4502511    | 1.719  | complement component 9                                                                               |
| 85 | 91105159   | 1.7171 | CD14 antigen precursor                                                                               |
| 86 | 42761474   | 1.6983 | CD59 antigen p18-20                                                                                  |
| 87 | 40217831   | 1.6803 | G protein-coupled receptor family C, group 5, member C isoform a                                     |
| 88 | 37694062   | 1.6679 | aquaporin 1                                                                                          |
| 89 | 148612887  | 1.6665 | choline transporter-like protein 4                                                                   |
| 90 | 4503143    | 1.6648 | cathepsin D preproprotein                                                                            |
| 91 | 31542984   | 1.661  | inter-alpha (globulin) inhibitor H4                                                                  |
| 92 | 12667788   | 1.6575 | myosin, heavy polypeptide 9, non-muscle                                                              |
| 93 | 11321561   | 1.642  | hemopexin                                                                                            |
| 94 | 6912236    | 1.6322 | angiopoietin-like 2 precursor                                                                        |
| 95 | 89357932   | 1.6119 | keratin 5b                                                                                           |
| 96 | 21361195   | 1.5958 | serine (or cysteine) proteinase inhibitor, clade A (alpha-1 antiproteinase, antitrypsin), member 5   |
| 97 | 41152114   | 1.5949 | aldo-keto reductase family 7, member A3                                                              |
| 98 | 24308440   | 1.5879 | family with sequence similarity 125, member A                                                        |
| 99 | 4507033    | 1.5843 | solute carrier family 5 (sodium/glucose cotransporter), member 2                                     |

|     |          |        |                                           |
|-----|----------|--------|-------------------------------------------|
| 100 | 63252913 | 1.5821 | gelsolin-like capping protein             |
| 101 | 67190748 | 1.5632 | complement component 4A preproprotein     |
| 102 | 4502599  | 1.5364 | carbonyl reductase 1                      |
| 103 | 73858564 | 1.5172 | corticosteroid binding globulin precursor |

**Table S4:** Variable Importance in Projection Scores for proteins by spectral count, NL vs PGD

| GI #      | VIP Scores | Top discriminating Proteins in the CTRL group                          |
|-----------|------------|------------------------------------------------------------------------|
| 4885049   | 8.093      | cardiac muscle alpha actin 1 proprotein                                |
| 4501889   | 6.1709     | actin, gamma 2 propeptide                                              |
| 42716297  | 5.9226     | clusterin isoform 1                                                    |
| 42740907  | 4.6241     | clusterin isoform 2                                                    |
| 14389309  | 3.7985     | tubulin alpha 6                                                        |
| 67782351  | 3.4398     | complement component 4B preproprotein                                  |
| 153792590 | 3.2261     | heat shock protein 90kDa alpha (cytosolic), class A member 1 isoform 1 |
| 33286422  | 3.1219     | pyruvate kinase, muscle isoform 2                                      |
| 19923483  | 3.0449     | GTPase Rab14                                                           |
| 33695095  | 2.967      | ras-related GTP-binding protein RAB10                                  |

| GI #     | VIP Scores | Top discriminating Proteins in the GDM group               |
|----------|------------|------------------------------------------------------------|
| 4503143  | 4.0378     | cathepsin D preproprotein                                  |
| 17986283 | 3.9943     | tubulin, alpha 1a                                          |
| 4502317  | 3.8459     | vacuolar H+ ATPase E1 isoform a                            |
| 7706683  | 3.5649     | Rh family, C glycoprotein                                  |
| 19913428 | 3.5516     | vacuolar H+ATPase B2                                       |
| 4885049  | 3.5127     | cardiac muscle alpha actin 1 proprotein                    |
| 14389309 | 3.4618     | tubulin alpha 6                                            |
| 21361181 | 3.4455     | Na+/K+ -ATPase alpha 1 subunit isoform a proprotein        |
| 19913426 | 3.4341     | ATPase, H+ transporting, lysosomal 56/58kDa, V1 subunit B1 |
| 11545731 | 3.3769     | gigaxonin                                                  |

| GI #      | VIP Scores | Top discriminating Proteins in the PGD group                      |
|-----------|------------|-------------------------------------------------------------------|
| 21361181  | 4.1922     | Na+/K+ -ATPase alpha 1 subunit isoform a proprotein               |
| 4885049   | 4.136      | cardiac muscle alpha actin 1 proprotein                           |
| 169171979 | 3.9129     | PREDICTED: similar to hCG1811191                                  |
| 4502111   | 3.7935     | annexin VII isoform 1                                             |
| 7706683   | 3.7318     | Rh family, C glycoprotein                                         |
| 42741659  | 3.636      | ATP-binding cassette sub-family B member 1                        |
| 7706451   | 3.5819     | G protein-coupled receptor, family C, group 5, member B precursor |
| 31377727  | 3.4821     | solute carrier family 44, member 2                                |
| 21389623  | 3.3071     | prominin 2                                                        |
| 42740907  | 3.1718     | clusterin isoform 2                                               |

**Table S5:** CTRL, GDM and PGD VIP protein differences between week 20 and week 36

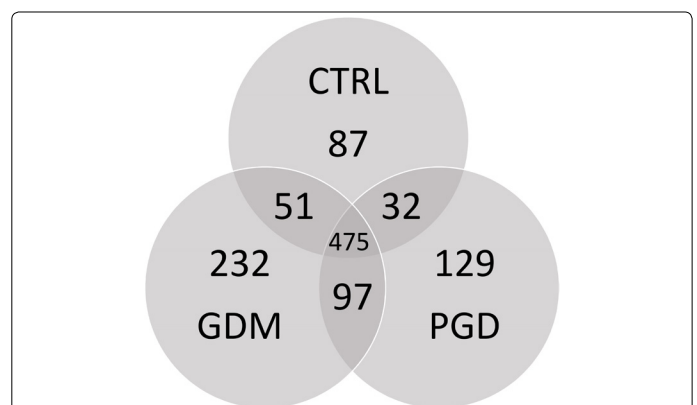

**Figure S1:** Venn diagram depicting the relationship of 20th week proteins for control (CTRL), gestational diabetic (GDM), and Pregestational diabetic (PGD) proteins. Only proteins present in at least 1 of the 2 replicates of every subject in the group are shown.

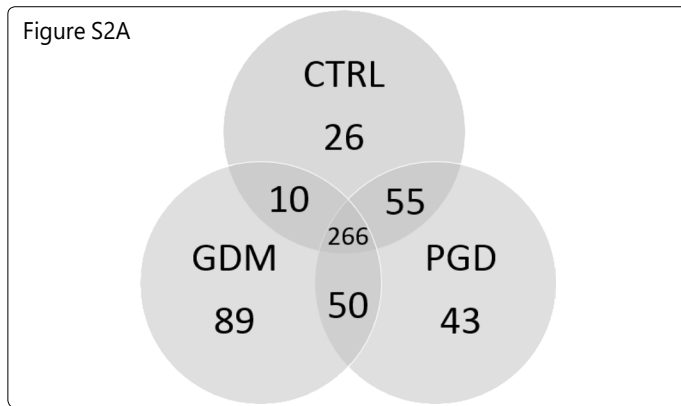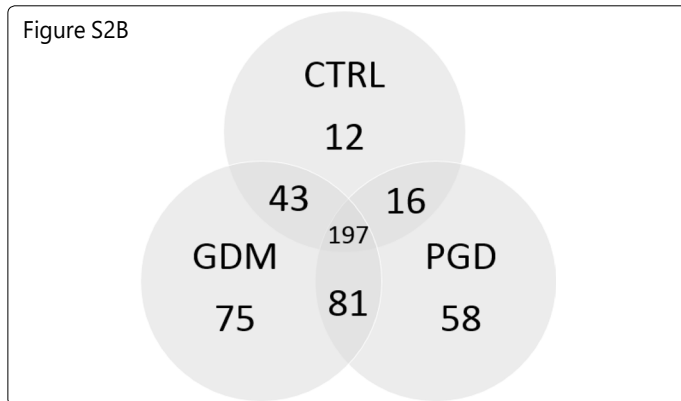

**Figure S2:** Venn diagram depicting the relationship of 20th week (A) and 36th week (B) proteins for control (CTRL), gestational diabetic (GDM), and Pregestational (PGD) groups.

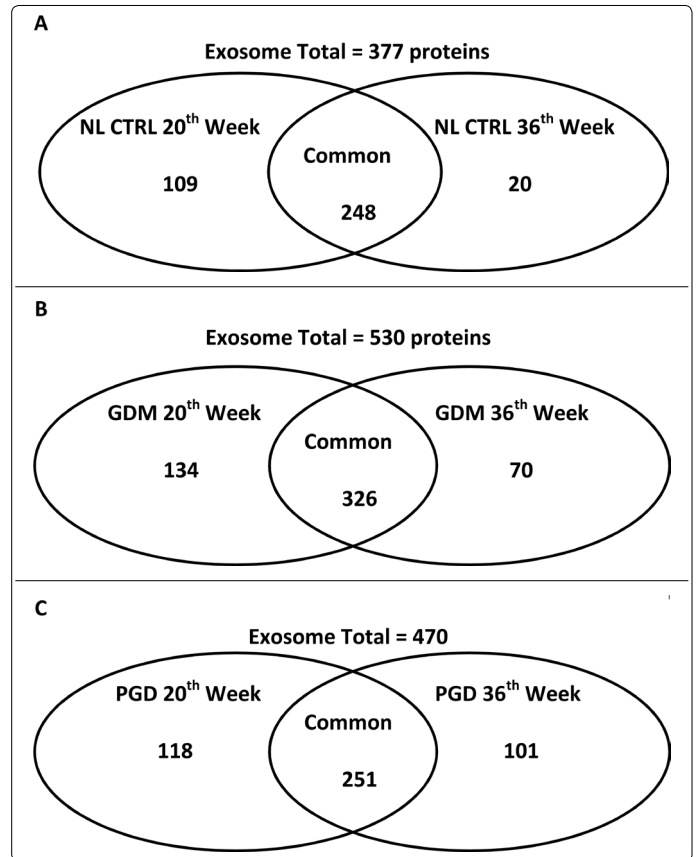

**Figure S3:** Groupwise 2-way split Venn diagram describing the spread of proteins between 20th and 36th week for CTRL (Panel A), GDM (Panel B) and PGD (Panel C) groups are shown. Whereas more than 5-fold reduction in the number of unique proteins identified between 20th and 36th week is observed in CTRL (109 versus 20); it is approximately half in GDM (134 versus 70), but remains almost unchanged in PGD (118 versus 101).
